# Supplementary material for: Hybrid polyoxometalate clusters with appended aromatic platforms
Source: Royal Society of Chemistry journal article supplement (doi:10.1039/b910434h), 2009-08-28
Supplement: b910434h.pdf [file b910434h.pdf]

Supplementary data for:

## **Hybrid Polyoxometalate Clusters with Appended Aromatic Platforms**

**Yu-Fei Song<sup>a,b</sup>, De-Liang Long<sup>b</sup>, Leroy Cronin<sup>b\*</sup>**

<sup>a</sup> State Key Laboratory of Chemical Resource Engineering, Beijing University of Chemical Technology, BeiSanHuan East Road 15, 100029, Beijing, P. R. China.

<sup>b</sup> WestCHEM, Department of Chemistry, University of Glasgow, Glasgow, G12 8QQ, UK. E-mail: L.Cronin@chem.gla.ac.uk; Fax (+44) 141 330 4888; Web: <http://www.croninlab.com>

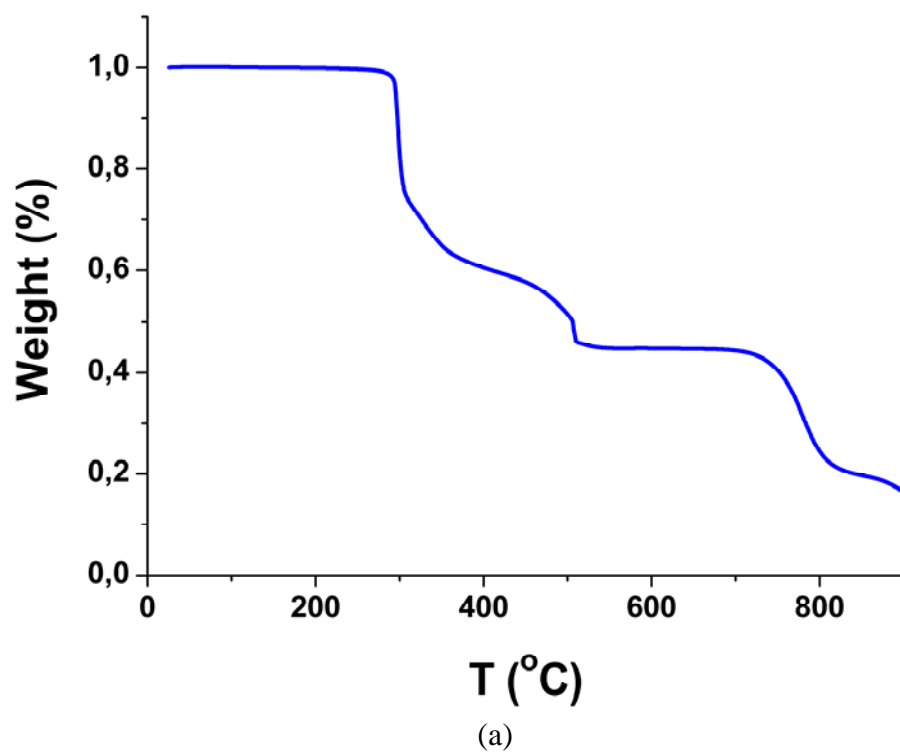

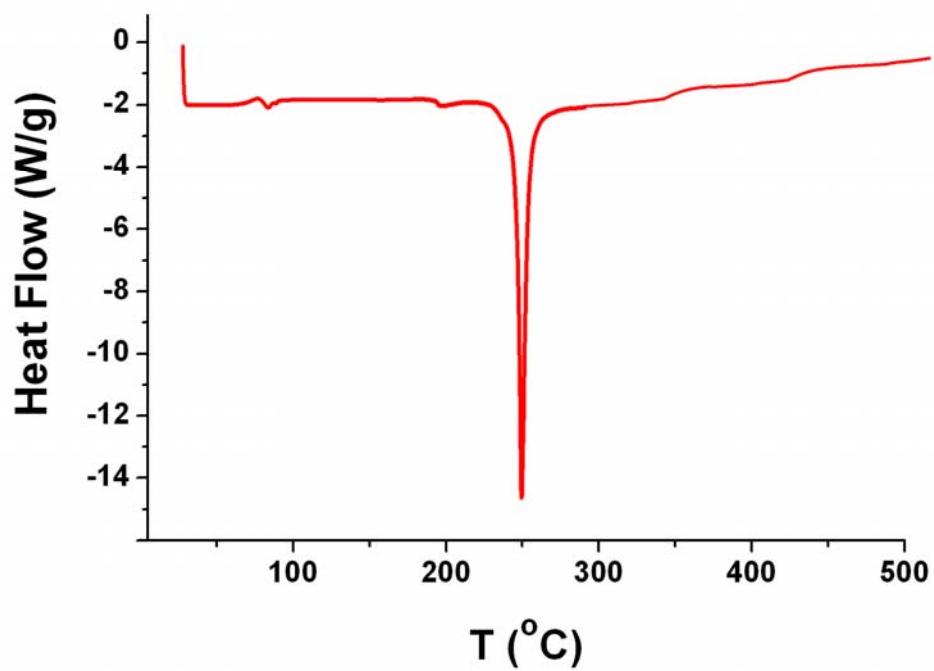

(b)

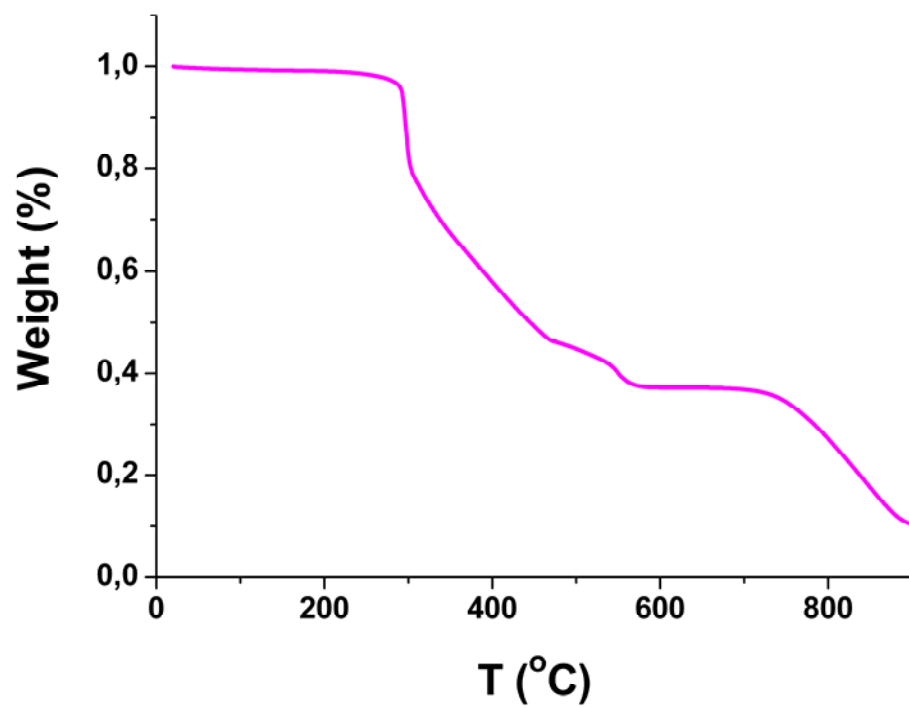

(c)

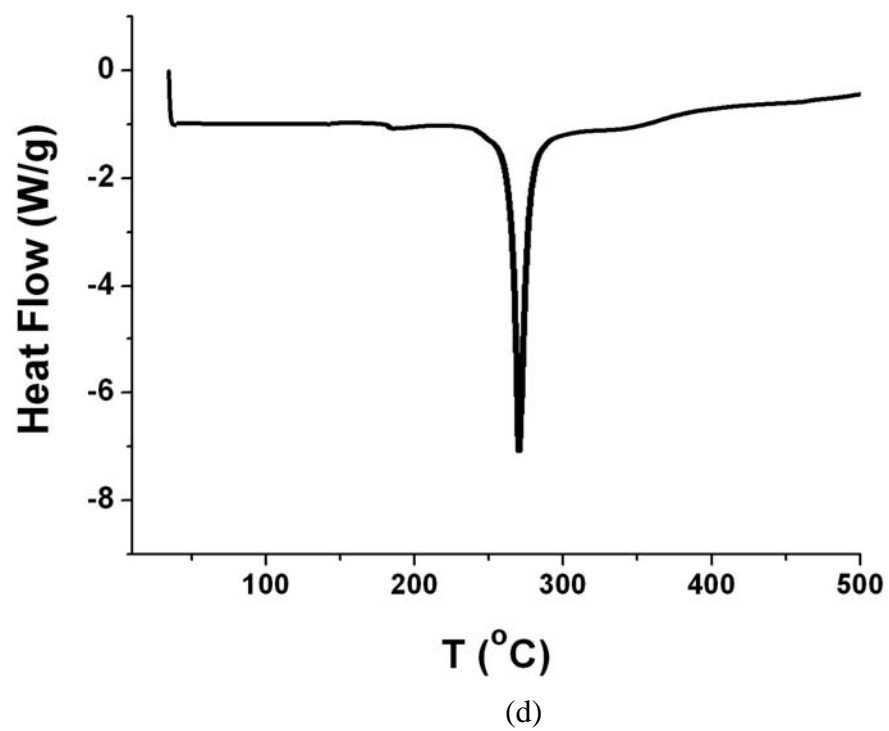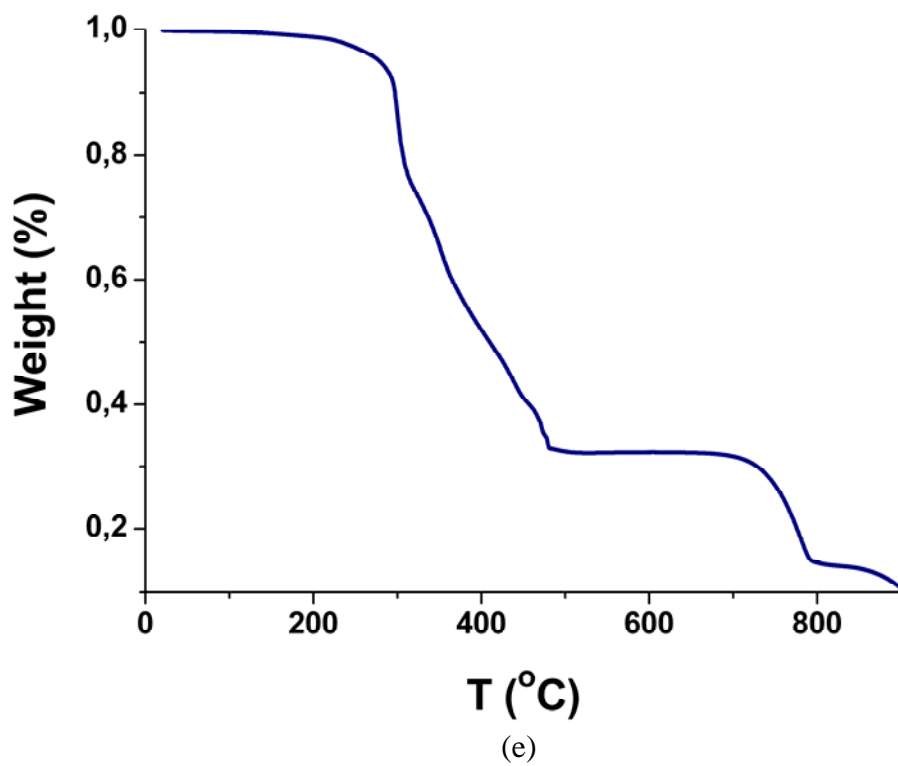

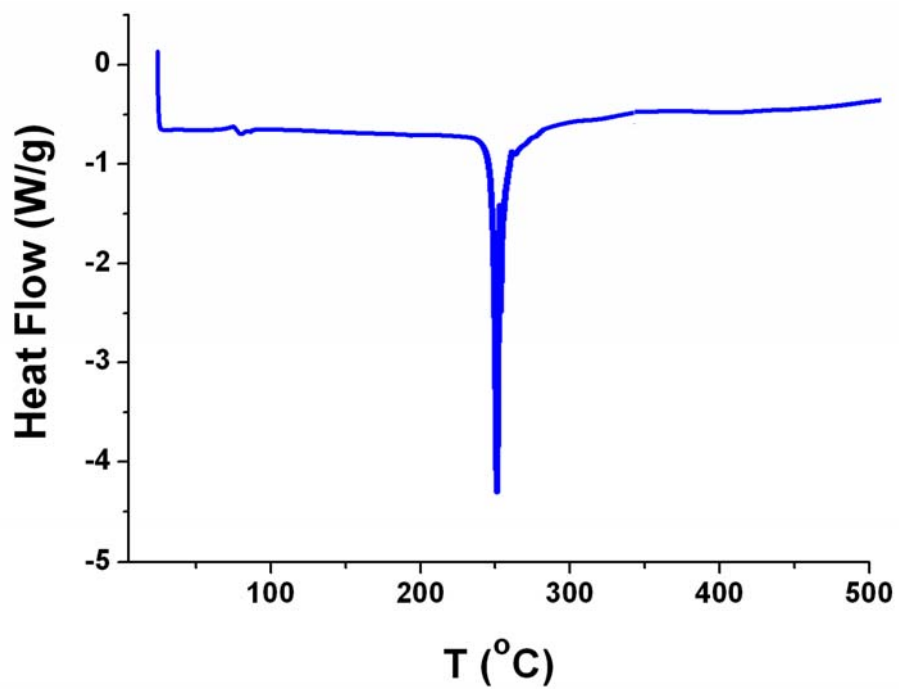

(f)

**Fig S1.** TGA and DSC curves for compound **3** (a and b), compound **4** (c and d) and compound **5** (e and f), respectively.
